# Supplementary material for: Structural determinants of the SINE B2 element embedded in the long non-coding RNA activator of translation AS Uchl1
Source: Springer Nature journal article supplement (doi:10.1038/s41598-017-14908-6), 2018-02-12
Supplement: MOESM1 [file 41598_2017_14908_MOESM1_ESM.pdf]

## SUPPLEMENTARY MATERIAL

### Structural determinants of the SINE B2 element embedded in the long non-coding RNA activator of translation AS *Uchl1*

Peter Podbevšek<sup>1,2,3</sup>, Francesca Fasolo<sup>1</sup>, Carlotta Bon<sup>1</sup>, Laura Cimatti<sup>1</sup>, Sabine Reißer<sup>4</sup>, Piero Carninci<sup>5</sup>, Giovanni Bussi<sup>4</sup>, Silvia Zucchelli<sup>1,6</sup>, Janez Plavec<sup>2,3,7,\*</sup> and Stefano Gustincich<sup>1,8\*</sup>

<sup>1</sup> Area of Neuroscience, SISSA, Trieste, Italy.

<sup>2</sup> Slovenian NMR Centre, National Institute of Chemistry, Ljubljana, Slovenia.

<sup>3</sup> EN-FIST Centre of Excellence, Ljubljana, Slovenia.

<sup>4</sup> Molecular and Statistical Biophysics, SISSA, Trieste, Italy.

<sup>5</sup> Division of Genomic Technologies, RIKEN Center for Life Science Technologies, Yokohama, Japan.

<sup>6</sup> Department of Health Sciences, Università del Piemonte Orientale, Novara, Italy.

<sup>7</sup> Faculty of Chemistry and Chemical Technology, University of Ljubljana, Ljubljana, Slovenia.

<sup>8</sup> Department of Neuroscience and Brain Technologies, Italian Institute of Technology, Genova, Italy.

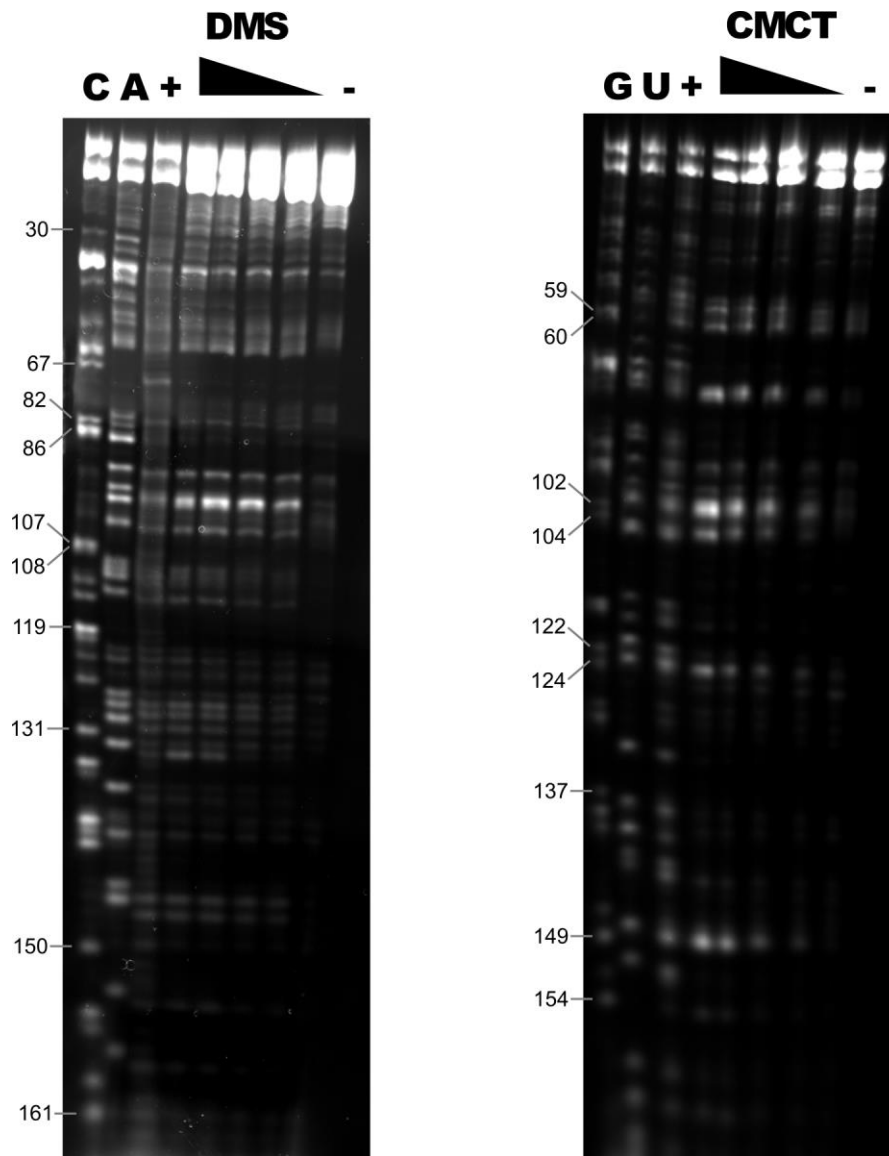

**Figure S1** Chemical footprinting of the invSINEB2/183 RNA construct. (left) A fluorescent gel with C and A sequencing lanes with nucleotide numbering. DMS lanes with invSINEB2/183 RNA treated with increasing DMS concentrations with positive (+) and negative (-) controls. (right) A fluorescent gel with G and U sequencing lanes with nucleotide numbering. CMCT lanes with invSINEB2/183 RNA treated with increasing CMCT concentrations with positive (+) and negative (-) controls.

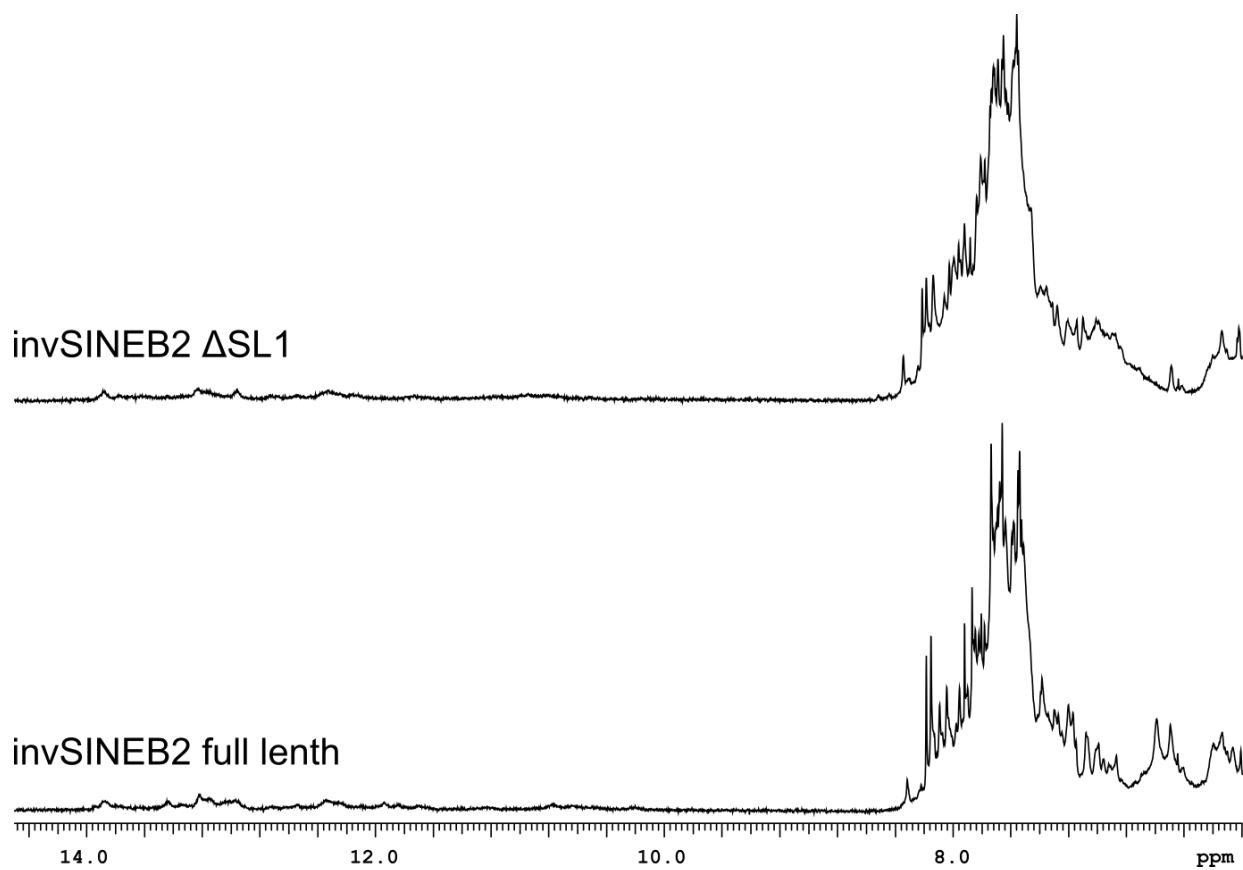

**Figure S2** Imino and aromatic regions of  $^1\text{H}$  NMR spectra of full length invSINEB2 RNA (183 nt) and the  $\Delta$ SL1 construct (173 nt) in 5%  $2\text{H}_2\text{O}/95\%$   $\text{H}_2\text{O}$  acquired at 25  $^\circ\text{C}$ .

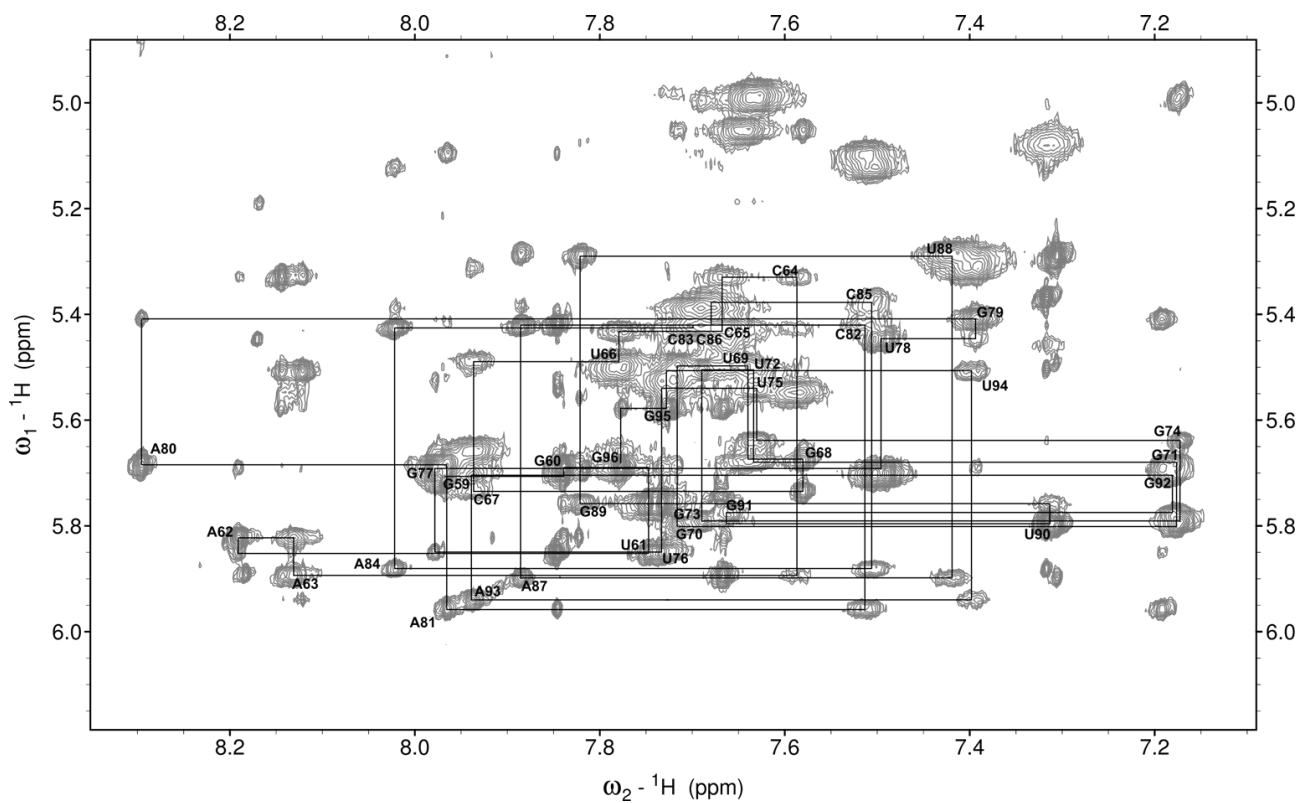

**Figure S3** Assignment of relevant resonances. Aromatic-anomeric region of a 2D NOESY NMR spectrum ( $\tau_m=250$  ms) of invSINEB2/38. The sequential walk is depicted as a black line.

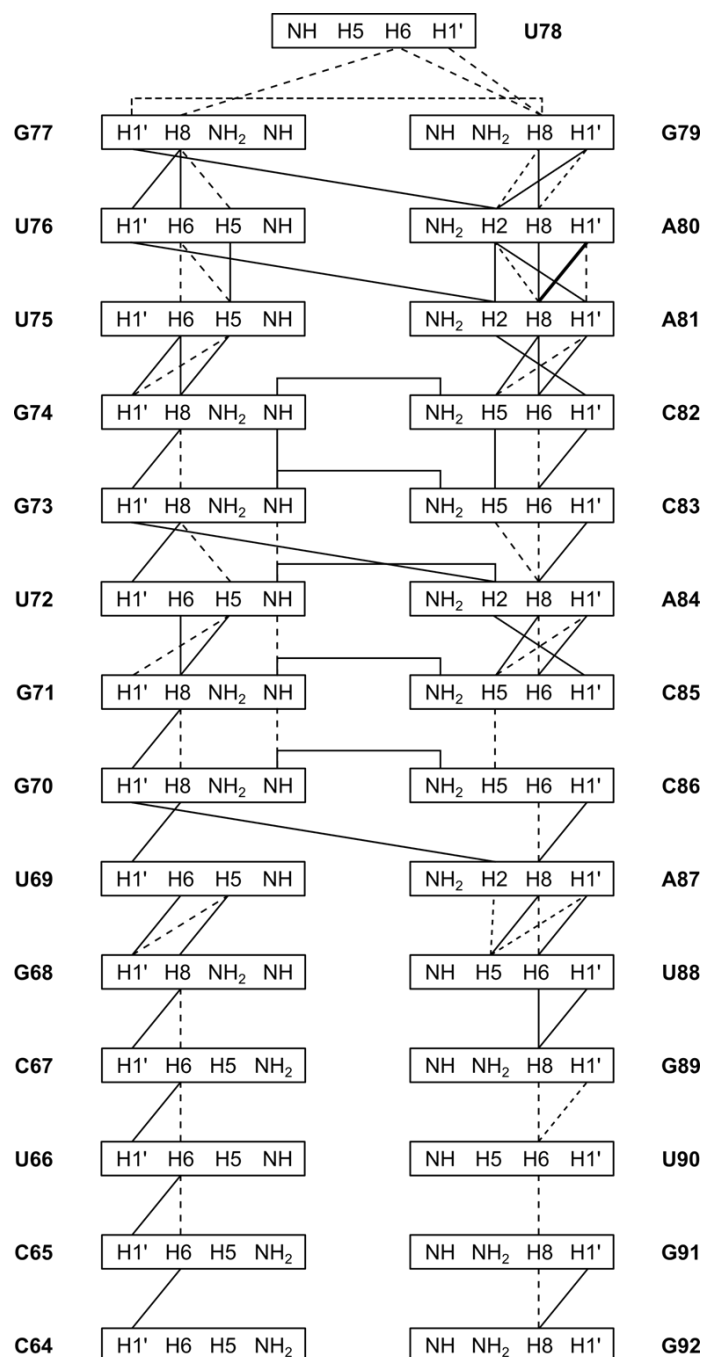

**Figure S4** A diagram of strong (bold line) medium (solid line) and weak (dashed line) NOE connectivities for the invSINEB2/38 molecule.

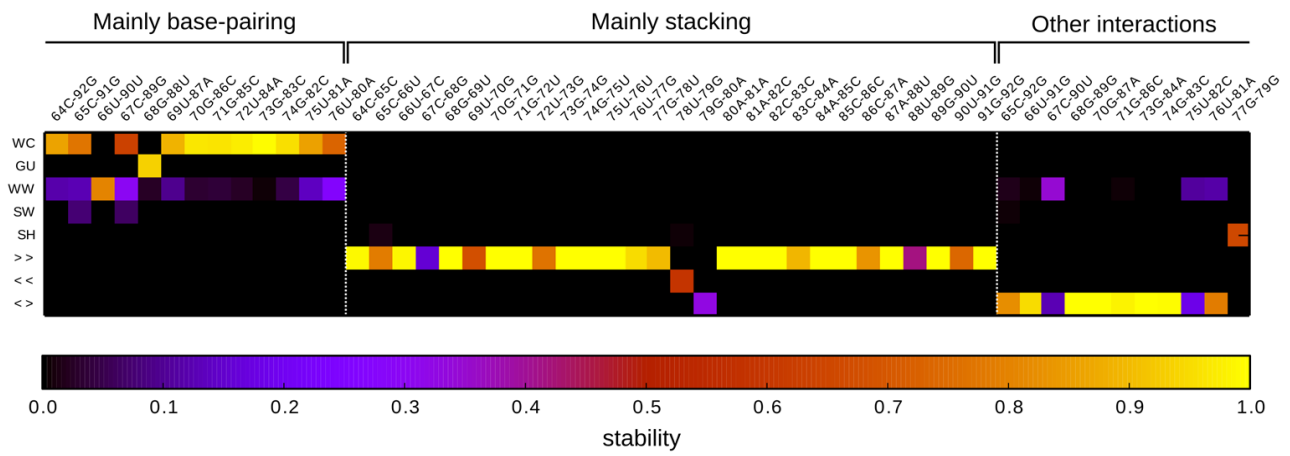

**Figure S5** Stability of annotations per pair of bases, calculated with baRNAbA (53) from the MD simulation. WC, GU and WW are interactions between the Watson-Crick edges of both bases. SW is a sugar-edge Watson-Crick-edge interaction, SH is a sugar-edge Hogsteen-edge interaction. >>, << and <> are stackings, in particular >> is the upward stacking found in a canonical double strand, << the downward stacking, and in <> the outward stacking.
